# Supplementary material
Source: PubMed Central journal article supplement (PMC2933299)
Supplement: NIHMS223700-supplement-1.pdf [file NIHMS223700-supplement-1.pdf]

## **Structural basis for selective activation of ABA receptors.**

Francis C. Peterson, E. Sethe Burgie, Sang-Youl Park, Davin R. Jensen, Joshua J. Weiner, Craig A. Bingman, Chia-An Chang, Sean R. Cutler, George N. Phillips, Jr., and Brian F. Volkman

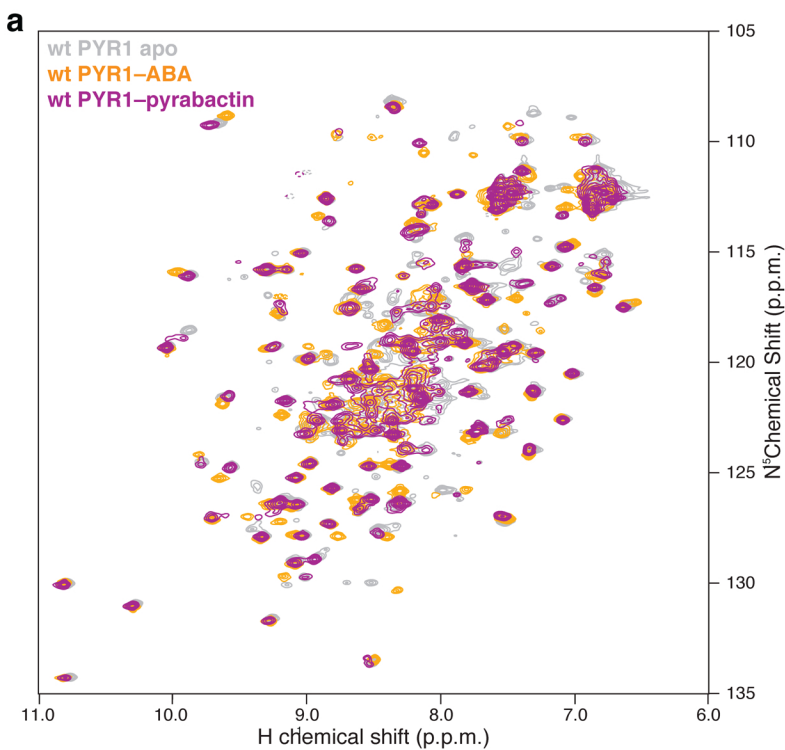

**Supplementary Fig. 1** Pyrabactin and ABA bind the same site in PYR1. **(a)**  $^1\text{H}$ - $^{15}\text{N}$  HSQC spectra of wild-type PYR1 shown in the unliganded (gray), abscisic acid-bound (orange), and pyrabactin-bound (purple) states. **(b)** and **(c)** Combined  $^1\text{H}/^{15}\text{N}$  chemical shift change graphed against residue number in monomeric PYR1 L166R. Colored bars denote significant changes ( $\Delta\delta > 0.10$  PPM combined chemical shift) between apo and abscisic acid-bound (orange) or pyrabactin-bound states (purple). Note similarly large shifts in the residues following the region marked “Gate” and moderate shifts around “Latch.” **(d)** and **(e)** Significant chemical shift changes from **(b)** and **(c)** were then highlighted onto the crystal structure of abscisic-acid bound PYR1 (PDB ID: 3K3K). Gray and white signify unperturbed and unassigned residues, respectively.

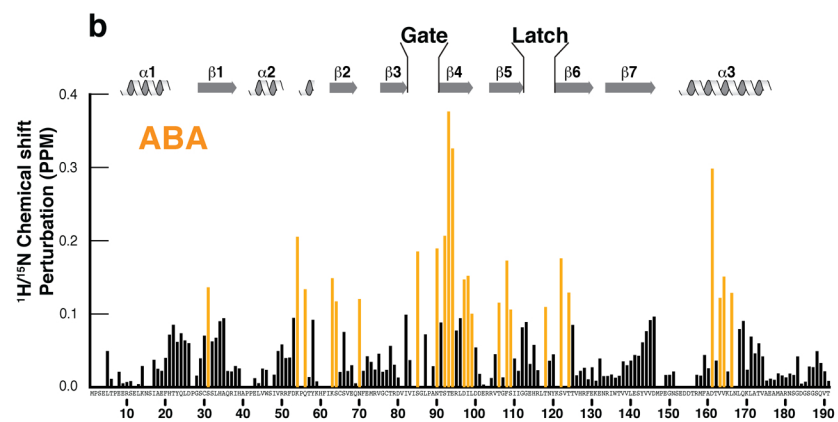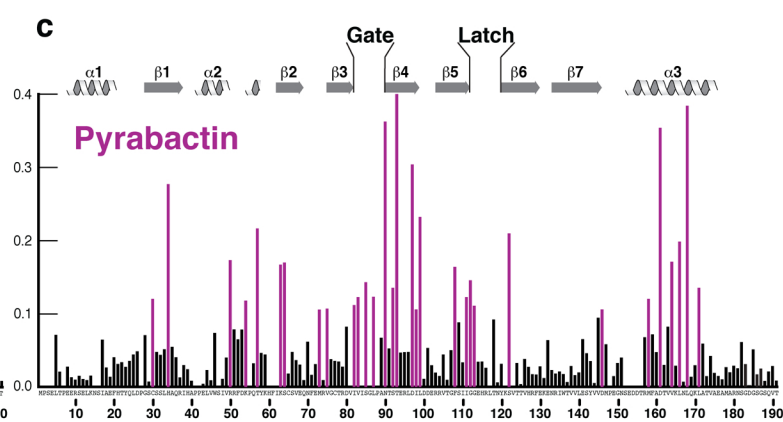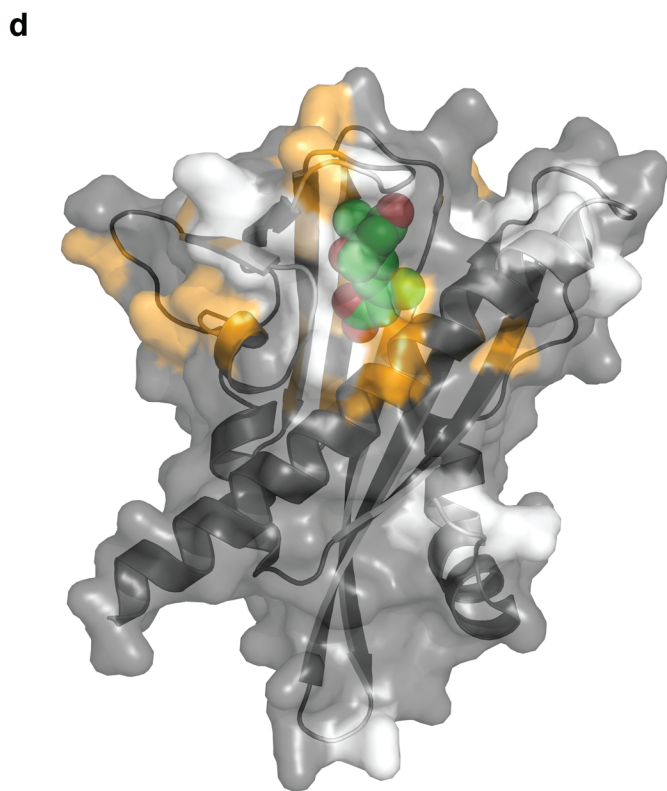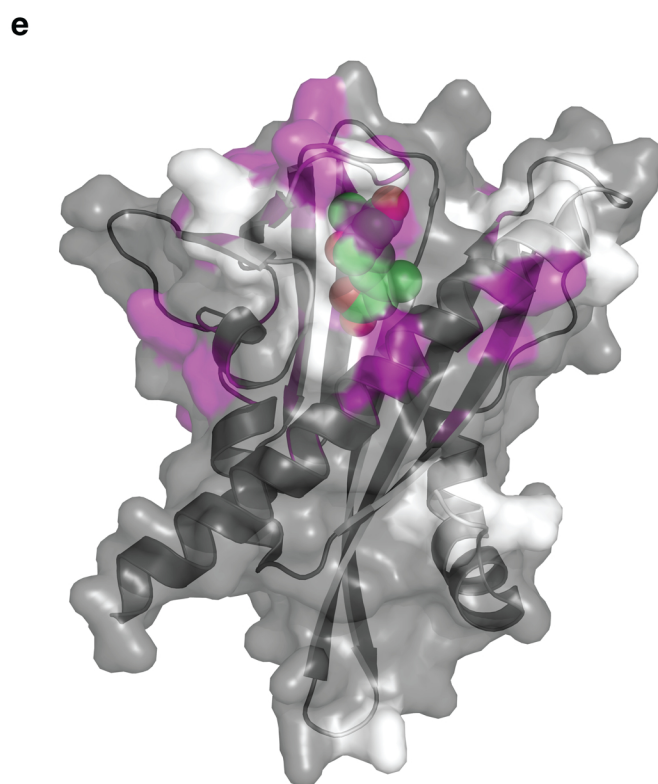

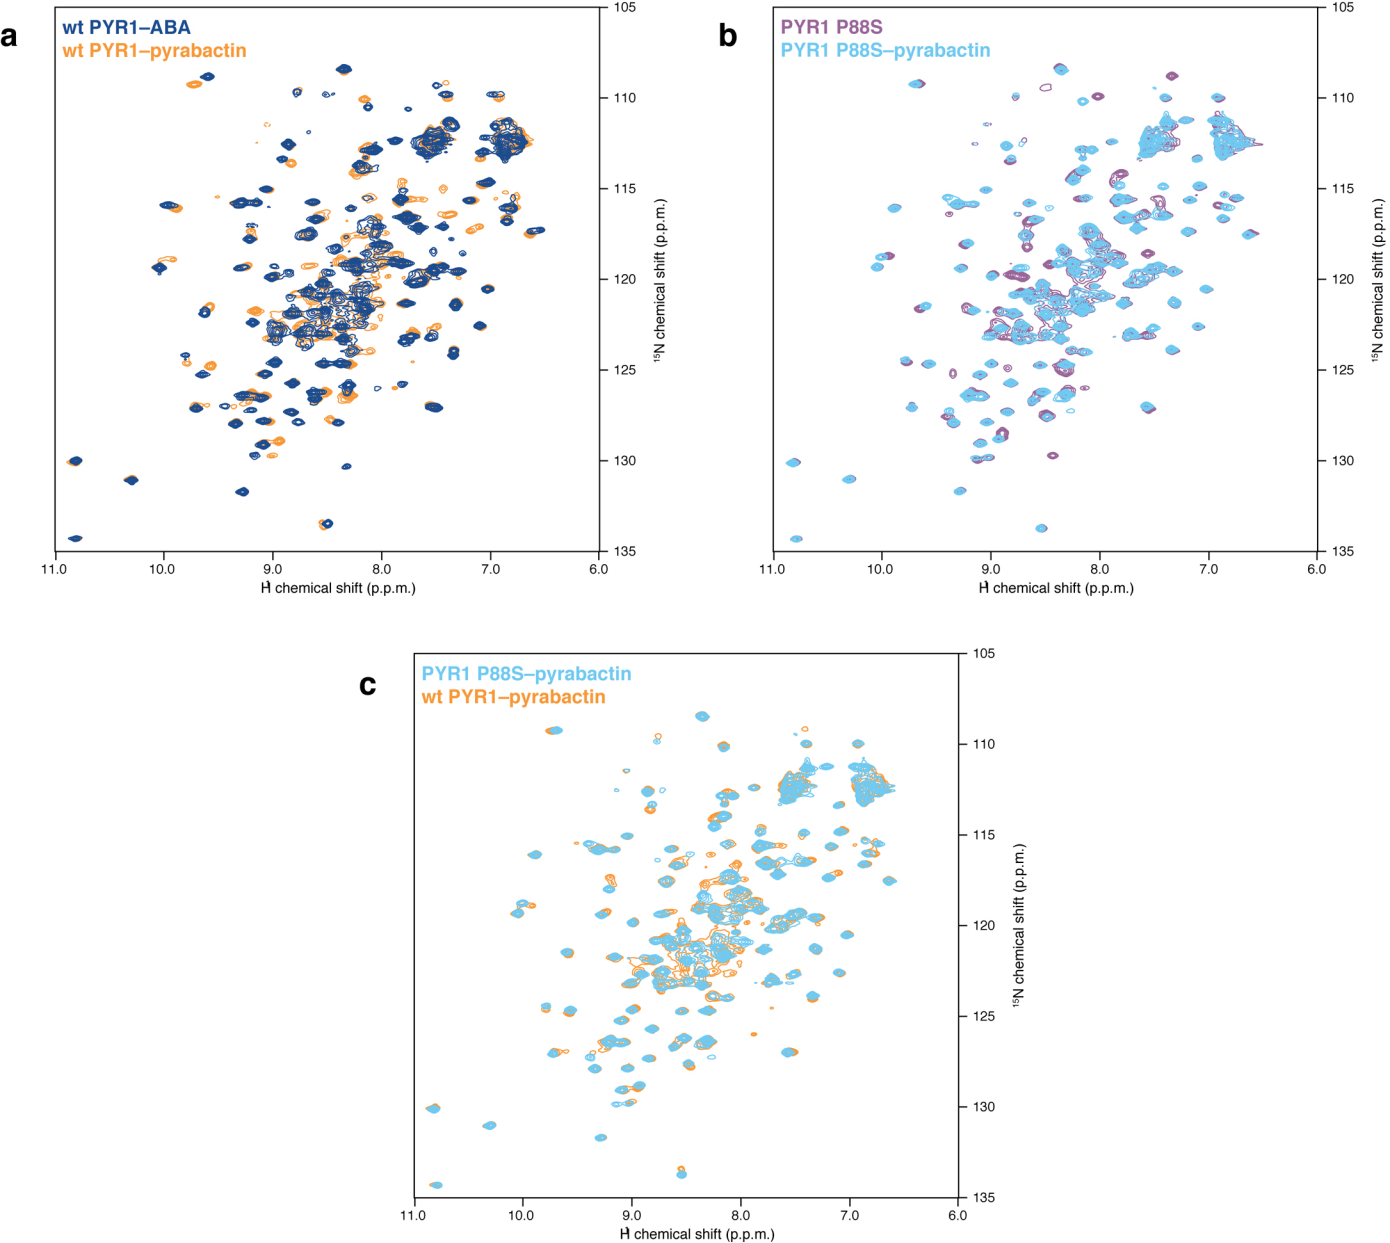

**Supplementary Fig. 2** PYR1 P88S and wild-type PYR1 respond similarly to pyrabactin.

(a)  $^1\text{H}$ - $^{15}\text{N}$  HSQC overlay of wild-type PYR1 saturated with ABA (blue) or pyrabactin (orange). (b) Differences in the HSQC spectra of PYR1 P88S in the absence (purple) or presence (cyan) of pyrabactin show that pyrabactin binds the mutant protein.

(c) HSQC spectra of wild-type PYR1-pyrabactin (orange) and PYR1 P88S-pyrabactin (cyan) are highly similar, suggesting that pyrabactin induced equivalent conformational changes in both proteins.

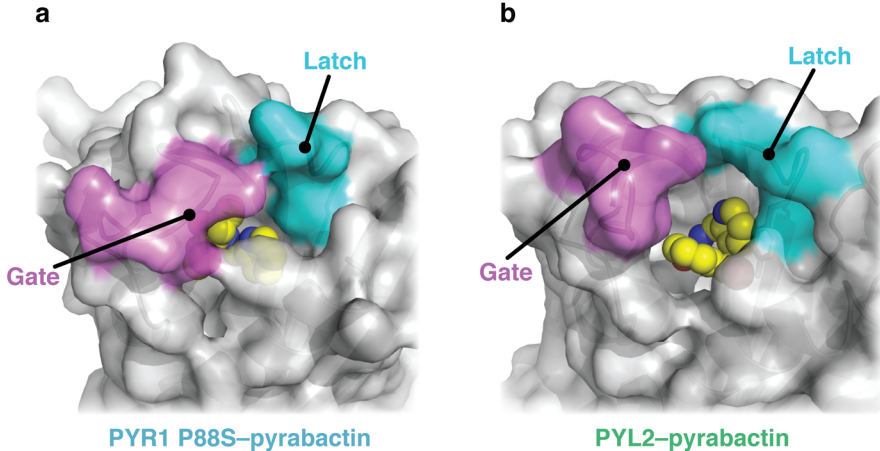

**Supplementary Fig. 3** Surface representations of PYR1 P88S and PYL2 bound to pyrabactin. Binding of pyrabactin elicits closure of the gate loop (magenta surface) in **(a)** PYR1 P88S but not **(b)** PYL2. The orientation of the latch loop (cyan surface) is similar in both PYR1 P88S and PYL2. The closed gate loop conformation sequesters pyrabactin in the binding pocket, reflects receptor activation and promotes PP2C binding.

Supplementary Table 1. Pyrabactin response mutants.

| Seq # | Mutation(s)  |              |              |              |
|-------|--------------|--------------|--------------|--------------|
| 1     | I48T         | F61L         | T91A         |              |
| 2     | V45A         | F61L         | W136R        |              |
| 3     | <b>I110V</b> | T125A        |              |              |
| 4     | <b>I110S</b> |              |              |              |
| 5     | V138A        | K170E        |              |              |
| 6     | I111T        |              |              |              |
| 7     | I111T        | K170E        | T173A        |              |
| 8     | E19G         | L44H         | F61L         |              |
| 9     | F61L         | <b>I110T</b> | E132G        |              |
| 10    | F61L         | M73V         | E149G        |              |
| 11    | <b>I62V</b>  | K170E        |              |              |
| 12    | F61L         | <b>I110T</b> | I111T        |              |
| 13    | H60R         | K170E        |              |              |
| 14    | K170E        |              |              |              |
| 15    | <b>I110S</b> |              |              |              |
| 16    | I111T        | K170E        | T173A        |              |
| 17    | F61L         | N90D         | <b>I110T</b> |              |
| 18    | <b>I110S</b> | E141G        |              |              |
| 19    | F61L         | N90D         | <b>I110T</b> |              |
| 20    | <b>I62V</b>  | K170E        |              |              |
| 22    | F61L         | I111M        |              |              |
| 24    | Y23C         | F61L         | V75I         | <b>I110T</b> |
| 26    | F61L         | I82T         | <b>I110T</b> | E132G        |
| 27    | <b>I110S</b> |              |              |              |
| 28    | I111T        | K170E        | T173A        |              |
| 29    | K14R         | K170E        |              |              |
| 30    | <b>I110S</b> |              |              |              |
| 31    | P41R         | F71L         | N133D        | K170E        |
| 32    | <b>I62V</b>  | K170E        |              |              |
| 33    | N119K        | K131I        |              |              |
| 34    | N119K        | K131I        | K170E        |              |
| 35    | F61L         | V67A         |              |              |
| 36    | H127R        | N133S        | K170E        |              |
| 37    | V45A         | F61L         | W136R        |              |
| 38    | N119K        | K131I        | K170E        |              |
| 40    | M73V         | K121N        | K170E        |              |
| 41    | N119K        | K131I        | K170E        |              |
| 42    | N119K        | K131I        | K170E        |              |
| 43    | T57A         | E141Q        |              |              |
| 44    | V45A         | F61L         | W136R        |              |
| 45    | N119K        | K131I        | K170E        |              |
| 46    | H60R         | <b>I62T</b>  | T104A        | E153G        |
| 47    | I111T        | K170E        | T173A        |              |
| 48    | I135T        |              |              |              |
| 49    | N133S        | K170E        |              |              |

Shown are the mutations present in 45 receptor clones isolated. These mutant receptors prevent pyrabactin response but allow ABA response. These mutants were isolated to define residues that are selectively needed for pyrabactin response. Shown in bold are the mutations isolated in either Ile110 or Ile62, italics denote the naturally occurring Ile->Val substitutions that were isolated.
